# Supplementary material for: Optimization of Hemoglobin Encapsulation within PLGA Nanoparticles and Their Investigation as Potential Oxygen Carriers
Source: MDPI journal article supplement (doi:10.3390/pharmaceutics13111958), 2021-11-18
Supplement: s1 [file s1]

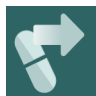

---

# **Supplementary Materials: Optimization of hemoglobin encapsulation within PLGA nanoparticles and their investigation as potential oxygen carriers**

Clara Coll-Satue, Michelle Maria Theresia Jansman, Peter Waaben Thulstrup and Leticia Hosta-Rigau



### Detailed overview of the assessed HbNPs.

Effect of various parameters on the prepared HbNPs. The concentration of protein, polymer and surfactant used to prepare each sample are specified. All tables include the size, polydispersity (PDI), loading content (LC), entrapment efficiency (EE) and functionality of the resulting HbNPs. The functionality of Hb has been classified depending on the shifts of the Soret peak and Q bands after purging with compressed air (oxy-Hb) or nitrogen gas (N<sub>2</sub>) (deoxy-Hb) for two subsequent cycles. As such, it has been considered that the HbNPs are not functional when the Soret peak after purging with N<sub>2</sub> did not shift towards wavelengths higher than 423 nm. The HbNPs have been classified as semi-functional when the Soret peak after the first deoxygenation step shifted towards wavelengths higher than 423 nm but not the second cycle. Finally, the HbNPs are regarded as functional when the Soret shifted towards wavelengths higher than 423 nm for the two subsequent deoxygenation cycles.

**Table S1.** Effects of the Hb concentration on the resulting HbNPs.

| Sample ID | Hb (mg mL <sup>-1</sup> ) | PLGA (mg mL <sup>-1</sup> ) | PVA (%) | Size (nm)    | PDI   | LC (%)     | EE (%)      | Functional | Wavelengths (nm) |     |     |          |     |     |         |     |     |          |     |     |
|-----------|---------------------------|-----------------------------|---------|--------------|-------|------------|-------------|------------|------------------|-----|-----|----------|-----|-----|---------|-----|-----|----------|-----|-----|
|           |                           |                             |         |              |       |            |             |            | Cycle 1          |     |     |          |     |     | Cycle 2 |     |     |          |     |     |
|           |                           |                             |         |              |       |            |             |            | Oxy-Hb           |     |     | Deoxy-Hb |     |     | Oxy-Hb  |     |     | Deoxy-Hb |     |     |
| PLGA-NPs  | 0                         | 12.5                        | 1       | 269.1 ± 10.5 | 0.074 | -          | -           | -          | -                | -   | -   | -        | -   | -   | -       | -   | -   | -        | -   | -   |
| HbNPs-1   | 5                         | 12.5                        | 1       | 262.5 ± 9.6  | 0.064 | -          | -           | -          | -                | -   | -   | -        | -   | -   | -       | -   | -   | -        | -   | -   |
| HbNPs-2   | 10                        | 12.5                        | 1       | 273.8 ± 18.5 | 0.093 | -          | -           | No         | 409              | -   | -   | 421      | -   | -   | 413     | 536 | 575 | -        | -   | -   |
| HbNPs-3   | 25                        | 12.5                        | 1       | 255.1 ± 8.4  | 0.060 | 1.8 ± 1.6  | 42.8 ± 12.0 | No         | 409              | -   | -   | 412      | -   | -   | -       | -   | -   | -        | -   | -   |
| HbNPs-4   | 50                        | 12.5                        | 1       | 277.7 ± 15.2 | 0.082 | 9.0 ± 2.8  | 30.1 ± 6.3  | No         | 414              | 539 | -   | 417      | 535 | 560 | 414     | 535 | -   | 414      | 532 | 575 |
| HbNPs-5   | 75                        | 12.5                        | 1       | 313.9 ± 33.0 | 0.156 | 14.9 ± 1.7 | 32.6 ± 3.1  | No         | 412              | 540 | 569 | 414      | -   | 559 | 412     | 539 | -   | 412      | -   | 559 |
| HbNPs-6   | 100                       | 12.5                        | 1       | 346.7 ± 27.5 | 0.144 | 20.6 ± 7.7 | 33.8 ± 6.2  | Semi       | 414              | 543 | 575 | 426      | -   | 561 | 416     | 542 | 575 | 421      | 535 | 560 |



**Table S2.** Effects of the Hb:TRE ratio on the resulting HbNPs.

| Sample ID   | Hb (mg mL <sup>-1</sup> ) | Hb:TRE ratio | Size (nm)    | PDI   | LC (%)     | EE (%)      | Functional | Wavelengths (nm) |     |     |          |     |     |         |     |     |          |     |     |
|-------------|---------------------------|--------------|--------------|-------|------------|-------------|------------|------------------|-----|-----|----------|-----|-----|---------|-----|-----|----------|-----|-----|
|             |                           |              |              |       |            |             |            | Cycle 1          |     |     |          |     |     | Cycle 2 |     |     |          |     |     |
|             |                           |              |              |       |            |             |            | Oxy-Hb           |     |     | Deoxy-Hb |     |     | Oxy-Hb  |     |     | Deoxy-Hb |     |     |
| HbNPs-4     | 50                        | 1:0          | 277.7 ± 15.2 | 0.082 | 9.0 ± 2.8  | 30.1 ± 6.3  | No         | 414              | 539 | -   | 417      | 535 | 560 | 414     | 535 | -   | 414      | 532 | 557 |
| HbNPs-4TRE1 | 50                        | 50:1         | 291.6 ± 0.4  | 0.110 | 8.4 ± 2.5  | 21.0 ± 4.3  | No         | 412              | 538 | 563 | 417      | 536 | 561 | 412     | 531 | -   | 414      | 533 | 560 |
| HbNPs-4TRE2 | 50                        | 20:1         | 267.6 ± 4.3  | 0.070 | 5.4 ± 0.7  | 18.7 ± 6.7  | No         | 411              | 540 | 563 | 414      | 534 | 560 | 411     | 531 | -   | 413      | 530 | 559 |
| HbNPs-4TRE3 | 50                        | 10:1         | 285.8 ± 20.9 | 0.087 | 5.7 ± 1.9  | 19.3 ± 6.5  | Semi       | 411              | 536 | -   | 425      | 532 | 560 | 411     | 525 | -   | 419      | 529 | 558 |
| HbNPs-4TRE4 | 50                        | 5:1          | 335.2 ± 21.8 | 0.224 | 4.5 ± 1.6  | 17.1 ± 0.8  | Yes        | 411              | 526 | -   | 425      | 529 | 559 | 412     | -   | -   | 424      | -   | 557 |
| HbNPs-4TRE5 | 50                        | 2:1          | 337.0 ± 22.0 | 0.230 | 2.5 ± 0.3  | 11.1 ± 2.1  | Yes        | 412              | 533 | -   | 427      | 531 | 560 | 414     | 528 | -   | 425      | 527 | 558 |
| HbNPs-4TRE6 | 50                        | 1:1          | 330.6 ± 12.3 | 0.136 | 2.2 ± 1.2  | 8.7 ± 3.2   | Yes        | 415              | 531 | -   | 427      | 530 | 559 | 414     | 545 | -   | 427      | -   | 560 |
| HbNPs-5     | 75                        | 1:0          | 313.9 ± 33.0 | 0.156 | 14.9 ± 1.7 | 32.6 ± 3.1  | No         | 412              | 540 | 569 | 414      | -   | 559 | 412     | 539 | -   | 412      | -   | 559 |
| HbNPs-5TRE1 | 75                        | 50:1         | 286.1 ± 0.1  | 0.109 | 11.5 ± 3.5 | 26.7 ± 10.5 | No         | 414              | 534 | -   | 415      | 530 | 558 | 413     | 525 | -   | 414      | 526 | -   |
| HbNPs-5TRE2 | 75                        | 20:1         | 281.8 ± 24.7 | 0.102 | 7.8 ± 1.5  | 17.9 ± 1.0  | Semi       | 413              | 537 | -   | 424      | 532 | 560 | 413     | 533 | -   | 417      | 530 | 558 |
| HbNPs-5TRE3 | 75                        | 10:1         | 296.2 ± 42.2 | 0.101 | 5.0 ± 0.7  | 15.2 ± 3.3  | Semi       | 412              | 534 | -   | 425      | 532 | 560 | 412     | 531 | -   | 421      | 529 | 558 |
| HbNPs-5TRE4 | 75                        | 5:1          | 284.6 ± 19.7 | 0.191 | 2.9 ± 1.4  | 8.0 ± 3.9   | Semi       | 411              | 542 | 566 | 425      | 533 | 560 | 412     | 538 | -   | 422      | 529 | 558 |
| HbNPs-6     | 100                       | 1:0          | 346.7 ± 27.5 | 0.144 | 20.6 ± 7.7 | 33.8 ± 6.2  | Semi       | 414              | 543 | 575 | 426      | -   | 561 | 416     | 542 | 575 | 421      | 535 | 560 |
| HbNPs-6TRE1 | 100                       | 50:1         | 301.1 ± 27.9 | 0.120 | 17.6 ± 0.7 | 22.4 ± 2.3  | Yes        | 414              | 542 | 572 | 426      | 535 | 560 | 415     | 540 | 572 | 424      | 535 | 560 |
| HbNPs-6TRE2 | 100                       | 20:1         | 320.8 ± 1.1  | 0.137 | 13.7 ± 0.0 | 17.3 ± 8.2  | Yes        | 414              | 545 | 572 | 427      | -   | 561 | 415     | 544 | 573 | 426      | 535 | 560 |
| HbNPs-6TRE3 | 100                       | 10:1         | 346.0 ± 14.5 | 0.213 | 14.3 ± 0.2 | 21.2 ± 3.7  | Yes        | 413              | 537 | -   | 427      | 532 | 560 | 413     | 534 | -   | 426      | 531 | 560 |
| HbNPs-6TRE4 | 100                       | 5:1          | 372.2        | 0.140 | 15.0       | 23.2        | Yes        | 411              | -   | 571 | 426      | -   | 561 | 413     | 547 | 574 | 426      | -   | 560 |



**Table S3.** Effects of the PLGA concentration on the resulting HbNPs.

| Sample ID | Hb (mg mL <sup>-1</sup> ) | PLGA (mg mL <sup>-1</sup> ) | PVA (%) | Size (nm)    | PDI   | LC (%)     | EE (%)      | Functional | Wavelengths (nm) |     |          |     |     |         |     |          |     |     |     |     |
|-----------|---------------------------|-----------------------------|---------|--------------|-------|------------|-------------|------------|------------------|-----|----------|-----|-----|---------|-----|----------|-----|-----|-----|-----|
|           |                           |                             |         |              |       |            |             |            | Cycle 1          |     |          |     |     | Cycle 2 |     |          |     |     |     |     |
|           |                           |                             |         |              |       |            |             |            | Oxy-Hb           |     | Deoxy-Hb |     |     | Oxy-Hb  |     | Deoxy-Hb |     |     |     |     |
| HbNPs-7   | 50                        | 1                           | 1       | 466.7        | 0.391 | 16.6       | 23.9        | Yes        | 411              | -   | 573      | 429 | -   | 562     | 416 | 545      | 576 | 429 | -   | 562 |
| HbNPs-8   | 50                        | 3                           | 1       | 421.8 ± 95.0 | 0.320 | 21.3 ± 3.6 | 31.6 ± 1.8  | Yes        | 413              | 540 | 564      | 428 | 532 | 561     | 415 | 536      | 572 | 428 | 532 | 560 |
| HbNPs-9   | 50                        | 5                           | 1       | 312.0 ± 9.8  | 0.155 | 18.7 ± 2.3 | 42.9 ± 4.8  | Yes        | 410              | 535 | -        | 428 | 532 | 560     | 414 | 534      | 573 | 427 | 530 | 559 |
| HbNPs-4   | 50                        | 12.5                        | 1       | 277.7 ± 15.2 | 0.082 | 9.0 ± 2.8  | 30.1 ± 6.3  | No         | 414              | 539 | -        | 417 | 535 | 560     | 414 | 535      | -   | 414 | 532 | 557 |
| HbNPs-10  | 50                        | 20                          | 1       | 306.9 ± 13.2 | 0.147 | 11.0 ± 2.4 | 50.3 ± 13.2 | No         | 413              | -   | -        | 415 | -   | -       | -   | -        | -   | -   | -   | -   |
| HbNPs-11  | 50                        | 40                          | 1       | 350.2 ± 25.7 | 0.121 | 9.9 ± 2.8  | 69.7 ± 17.9 | No         | 412              | -   | -        | 412 | -   | -       | -   | -        | -   | -   | -   | -   |
| HbNPs-12  | 75                        | 1                           | 1       | 476.8        | 0.397 | 24.3       | 27.6        | Yes        | 409              | -   | -        | 429 | -   | 562     | 416 | -        | 578 | 430 | -   | 563 |
| HbNPs-13  | 75                        | 3                           | 1       | 369.7 ± 23.7 | 0.241 | 29.0 ± 3.0 | 41.5 ± 12.1 | Yes        | 410              | 536 | -        | 428 | 533 | 560     | 414 | 536      | 574 | 428 | 531 | 560 |
| HbNPs-14  | 75                        | 5                           | 1       | 331.4 ± 12.2 | 0.174 | 21.7 ± 3.1 | 38.0 ± 13.7 | Yes        | 410              | 534 | -        | 428 | 531 | 560     | 414 | 534      | 572 | 427 | 531 | 559 |
| HbNPs-5   | 75                        | 12.5                        | 1       | 313.9 ± 33.0 | 0.156 | 14.9 ± 1.7 | 32.6 ± 3.1  | No         | 414              | -   | -        | 420 | -   | 558     | 414 | -        | -   | 417 | -   | -   |
| HbNPs-15  | 75                        | 20                          | 1       | 297.9 ± 24.2 | 0.093 | 19.3 ± 0.8 | 58.4 ± 4.2  | No         | 415              | -   | -        | 414 | -   | -       | -   | -        | -   | -   | -   | -   |
| HbNPs-16  | 75                        | 40                          | 1       | 336.6 ± 10.7 | 0.099 | 15.3 ± 0.8 | 73.3 ± 14.2 | No         | 416              | 527 | -        | 417 | 529 | -       | -   | -        | -   | -   | -   | -   |
| HbNPs-17  | 100                       | 1                           | 1       | 488.9        | 0.284 | 36.4       | 23.0        | Yes        | 413              | 541 | -        | 429 | 533 | 561     | 414 | 539      | 574 | 428 | -   | 561 |
| HbNPs-18  | 100                       | 3                           | 1       | 404.0 ± 54.9 | 0.285 | 27.4 ± 2.0 | 25.8 ± 3.1  | Yes        | 411              | 535 | -        | 428 | 532 | 560     | 414 | 535      | 573 | 428 | 531 | 560 |
| HbNPs-19  | 100                       | 5                           | 1       | 365.0 ± 41.1 | 0.192 | 21.8 ± 2.1 | 28.7 ± 2.8  | Yes        | 412              | 534 | -        | 427 | 532 | 560     | 414 | 535      | 571 | 427 | 530 | 560 |
| HbNPs-6   | 100                       | 12.5                        | 1       | 346.7 ± 27.5 | 0.144 | 20.6 ± 7.7 | 33.8 ± 6.2  | Semi       | 414              | 543 | 575      | 426 | -   | 561     | 414 | 542      | 575 | 421 | 535 | 560 |
| HbNPs-20  | 100                       | 20                          | 1       | 325.3 ± 7.6  | 0.154 | 20.4 ± 0.7 | 57.4 ± 2.7  | No         | 415              | 534 | -        | 417 | -   | -       | 414 | -        | -   | -   | -   | -   |
| HbNPs-21  | 100                       | 40                          | 1       | 362.0 ± 28.0 | 0.155 | 20.8 ± 4.3 | 78.6 ± 2.0  | No         | 415              | 533 | -        | 416 | -   | -       | 416 | -        | -   | -   | -   | -   |



**Table S4.** Effects of the PVA concentration on the resulting HbNPs.

| Sample ID | Hb (mg mL <sup>-1</sup> ) | PLGA (mg mL <sup>-1</sup> ) | PVA (%) | Size (nm)    | PDI   | LC (%)     | EE (%)      | Functional | Wavelengths (nm) |     |     |          |     |     |         |     |     |          |     |     |
|-----------|---------------------------|-----------------------------|---------|--------------|-------|------------|-------------|------------|------------------|-----|-----|----------|-----|-----|---------|-----|-----|----------|-----|-----|
|           |                           |                             |         |              |       |            |             |            | Cycle 1          |     |     |          |     |     | Cycle 2 |     |     |          |     |     |
|           |                           |                             |         |              |       |            |             |            | Oxy-Hb           |     |     | Deoxy-Hb |     |     | Oxy-Hb  |     |     | Deoxy-Hb |     |     |
| HbNPs-22  | 50                        | 5                           | 0.2     | 470.0        | 0.199 | 15.2       | 37.7        | Yes        | 412              | 534 | -   | 429      | 534 | 561 | 416     | -   | 556 | 428      | -   | 561 |
| HbNPs-23  | 50                        | 5                           | 0.5     | 379.0 ± 44.3 | 0.175 | 13.9 ± 1.9 | 39.8 ± 5.2  | Yes        | 411              | -   | 574 | 428      | -   | 561 | 414     | 543 | 577 | 428      | -   | 560 |
| HbNPs-9   | 50                        | 5                           | 1.0     | 312.0 ± 9.8  | 0.155 | 18.7 ± 2.3 | 42.9 ± 4.8  | Yes        | 410              | 535 | -   | 428      | 532 | 560 | 414     | 534 | 573 | 427      | 530 | 559 |
| HbNPs-24  | 50                        | 5                           | 2.0     | 253.7 ± 19.9 | 0.160 | 9.7 ± 0.9  | 20.5 ± 9.1  | Yes        | 409              | 532 | -   | 427      | 532 | 559 | 413     | -   | -   | 424      | -   | -   |
| HbNPs-25  | 75                        | 3                           | 0.2     | 357.5        | 0.317 | 25.2       | 31.6        | Yes        | 413              | -   | 583 | 430      | -   | 562 | 418     | -   | 579 | 430      | -   | 562 |
| HbNPs-26  | 75                        | 3                           | 0.5     | 344.5 ± 36.5 | 0.172 | 26.9 ± 1.7 | 40.7 ± 5.4  | Yes        | 417              | 542 | 564 | 429      | 532 | 561 | 417     | 540 | 564 | 429      | 533 | 561 |
| HbNPs-13  | 75                        | 3                           | 1.0     | 369.7 ± 23.7 | 0.241 | 29.0 ± 3.0 | 41.5 ± 12.1 | Yes        | 410              | 536 | -   | 428      | 533 | 560 | 414     | 536 | 574 | 428      | 531 | 560 |
| HbNPs-27  | 75                        | 3                           | 2.0     | 349.6 ± 25.0 | 0.258 | 20.8 ± 0.2 | 27.3 ± 11.9 | Yes        | 409              | 542 | 564 | 428      | -   | 560 | 414     | 539 | 575 | 427      | -   | 560 |
| HbNPs-28  | 75                        | 5                           | 0.2     | 484.4        | 0.427 | 26.7       | 39.4        | Yes        | 412              | -   | 561 | 429      | 535 | 561 | 418     | -   | 576 | 428      | -   | 561 |
| HbNPs-29  | 75                        | 5                           | 0.5     | 352.1 ± 41.2 | 0.165 | 24.9 ± 2.3 | 41.9 ± 10.5 | Yes        | 411              | 536 | -   | 428      | 533 | 560 | 414     | 536 | 575 | 428      | 533 | 560 |
| HbNPs-14  | 75                        | 5                           | 1.0     | 331.4 ± 12.2 | 0.174 | 21.7 ± 3.1 | 38.0 ± 13.7 | Yes        | 410              | 534 | -   | 428      | 531 | 560 | 414     | 534 | 572 | 427      | 531 | 559 |
| HbNPs-30  | 75                        | 5                           | 2.0     | 307.4 ± 47.8 | 0.249 | 18.3 ± 1.9 | 19.7 ± 6.3  | Yes        | 408              | 539 | 563 | 428      | -   | 560 | 414     | 536 | 575 | 428      | 534 | 559 |



# Preparation and characterization of the HbNPs with different PVA volumes.

To determine the effect of the PVA volume on the prepared HbNPs, 2 mL PLGA (3 mg mL<sup>-1</sup> in DCM) was added to 250 µL Hb (75 mg mL<sup>-1</sup> in PBS) and the primary *w1/o* emulsion was obtained by sonication on ice. Next, the *w1/o* emulsion was added to a PVA solution (5–30 mL, 1% in MQ), and sonicated again to form the double *w1/o/w2* emulsion. The final preparation was stirred for 30 min, followed by removal of the remaining organic solvent using a rotavapor. The resulting HbNPs suspension was washed in TRIS 1 (2×, 6500 g, 10 min, 4 °C) and stored at 4 °C until usage.

**Table S5.** Effects of the PVA volume on the resulting HbNPs.

| Sample ID | Hb (mg mL <sup>-1</sup> ) | PLGA (mg mL <sup>-1</sup> ) | PVA (mL) | PVA (%) | Size (nm)    | PDI   | LC (%)     | EE (%)      | Functional | Wavelengths (nm) |     |     |          |     |     |         |     |     |          |     |     |
|-----------|---------------------------|-----------------------------|----------|---------|--------------|-------|------------|-------------|------------|------------------|-----|-----|----------|-----|-----|---------|-----|-----|----------|-----|-----|
|           |                           |                             |          |         |              |       |            |             |            | Cycle 1          |     |     |          |     |     | Cycle 2 |     |     |          |     |     |
|           |                           |                             |          |         |              |       |            |             |            | Oxy-Hb           |     |     | Deoxy-Hb |     |     | Oxy-Hb  |     |     | Deoxy-Hb |     |     |
| HbNPs-31  | 75                        | 3                           | 5        | 0.5     | 399.1 ± 48.3 | 0.209 | 22.6 ± 2.0 | 38.8 ± 1.3  | Yes        | 413              | 534 | -   | 427      | 532 | 561 | 413     | 530 | -   | 428      | -   | 561 |
| HbNPs-32  | 75                        | 3                           | 9        | 0.5     | 411.3 ± 81.1 | 0.250 | 27.3 ± 4.7 | 38.9 ± 3.3  | Yes        | 414              | 533 | -   | 428      | 531 | 560 | 415     | 530 | -   | 428      | 531 | 560 |
| HbNPs-26  | 75                        | 3                           | 10       | 0.5     | 344.5 ± 36.5 | 0.172 | 26.9 ± 1.7 | 40.7 ± 5.4  | Yes        | 417              | 542 | 564 | 429      | 532 | 561 | 417     | 540 | 564 | 429      | 533 | 561 |
| HbNPs-33  | 75                        | 3                           | 20       | 0.5     | 385.4 ± 36.4 | 0.147 | 25.9 ± 3.3 | 37.3 ± 17.3 | Yes        | 414              | 531 | -   | 428      | 530 | 561 | 414     | -   | -   | 426      | -   | 559 |
| HbNPs-34  | 75                        | 3                           | 30       | 0.5     | 348.4 ± 8.5  | 0.179 | 14.8 ± 1.7 | 20.4 ± 1.4  | Yes        | 411              | 532 | -   | 427      | 530 | 560 | 413     | -   | -   | 427      | -   | 558 |



### Preparation and characterization of the HbNPs with different DCM:EA ratios.

To determine the effect of organic solvent on the prepared HbNPs, 2 mL PLGA (12.5 mg mL<sup>-1</sup> in DCM, EA, or a combination thereof) was added to 250 µL Hb (50 mg mL<sup>-1</sup> in PBS) and the primary *w1/o* emulsion was obtained by sonication on ice. Next, the *w1/o* emulsion was added to a 10 mL PVA solution (1% in MQ) and sonicated again to form the double *w1/o/w2* emulsion. The final preparation was stirred for 30 min, followed by removal of the remaining organic solvent using a rotavapor. The resulting HbNPs suspension was washed in TRIS 1 (2×, 6500 g, 10 min, 4 °C) and stored at 4 °C until usage.

**Table S6.** Effects of the DCM:EA ratio on the resulting HbNPs.

| Sample ID | Hb (mg mL <sup>-1</sup> ) | PLGA (mg mL <sup>-1</sup> ) | PVA (mL) | PVA (%) | Solvent      | Solvent evaporation | Size (nm)    | PDI   | LC (%)     | EE (%)     |
|-----------|---------------------------|-----------------------------|----------|---------|--------------|---------------------|--------------|-------|------------|------------|
| HbNPs-4   | 50                        | 12.5                        | 10       | 1       | DCM          | Rotavapor           | 227.7 ± 15.2 | 0.082 | 9.0 ± 2.8  | 30.1 ± 6.3 |
| HbNPs-35  | 50                        | 12.5                        | 10       | 1       | DCM:EA (2:1) | Rotavapor           | 357.9        | 0.252 | 7.2        | 37.1       |
| HbNPs-36  | 50                        | 12.5                        | 10       | 1       | DCM:EA (1:1) | Rotavapor           | 281.5 ± 49.9 | 0.147 | 7.0 ± 1.0  | 21.4 ± 6.3 |
| HbNPs-37  | 50                        | 12.5                        | 10       | 1       | DCM:EA (1:2) | Rotavapor           | 320.7        | 0.236 | 5.6        | 25.0       |
| HbNPs-38  | 50                        | 12.5                        | 10       | 1       | EA           | Rotavapor           | 246.6 ± 58.9 | 0.159 | Negligible | 4.8 ± 4.1  |



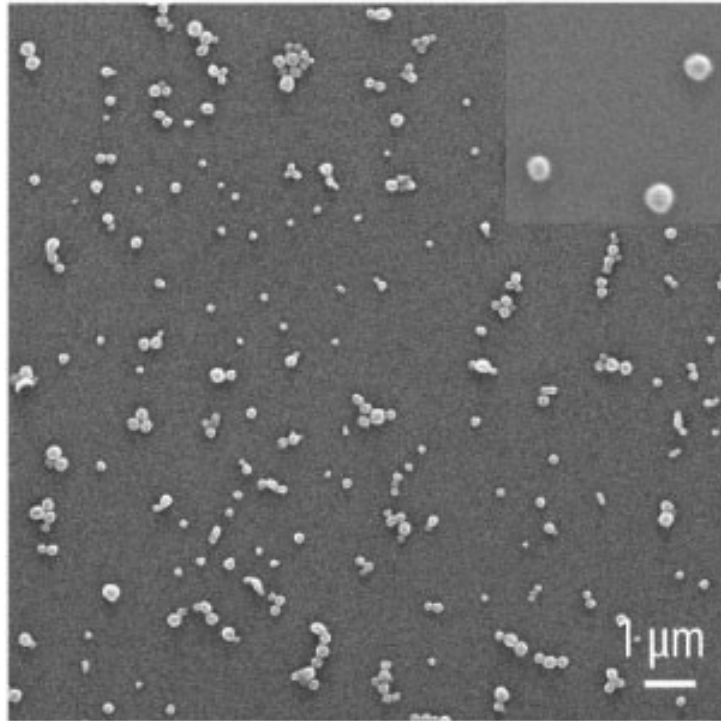

**Figure S1.** SEM image of the bare PLGA-NPs.

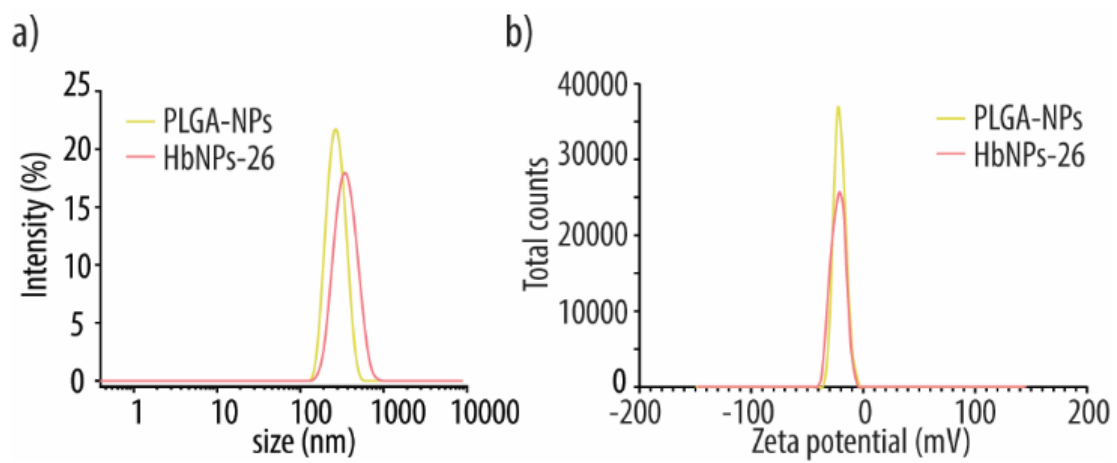

**Figure S2.** Size and zeta potential histograms comparing PLGA-NPs and HbNPs-26.



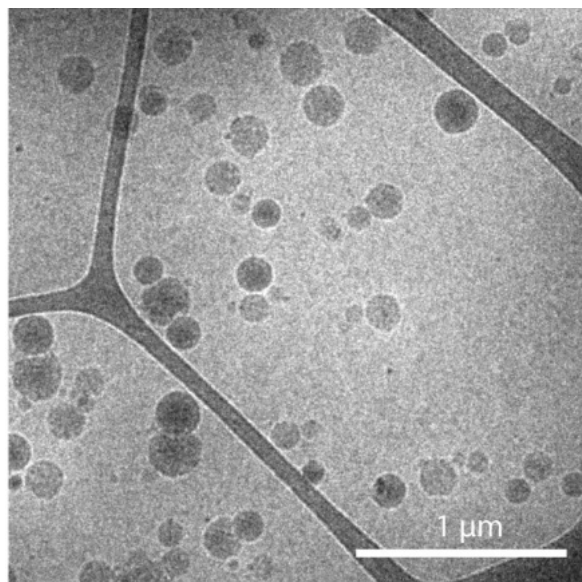

**Figure S3.** CryoTEM image of the optimized HbNPs, showing uniform electron-opaque particles without the presence of transverse layers. The image was obtained similarly to Jansman *et al.* using a FEI Tecnai G2 20 TWIN TEM operated at 200 keV in low dose mode with a FEI High-Sensitive 4k x 4k Eagle camera.<sup>1</sup>

<sup>1</sup> Jansman, M.M.T.; Liu, X.; Kempen, P.; Clergeaud, G.; Andresen, T.L.; Thulstrup, P.W.; Hosta-Rigau, L. Hemoglobin-Based Oxygen Carriers Incorporating Nanozymes for the Depletion of Reactive Oxygen Species. *ACS Appl. Mater. Interfaces* **2020**, *12*, 50275–50286, doi:10.1021/acsami.0c14822



## HbNPs functionality under physiological conditions in cell culture

### 1. Incubation of the optimized HbNPs with blood cells.

Blood from healthy donors was extracted and collected in heparin-coated tubes. Then, the blood was washed with PBS (3 $\times$ , 1000 g, 15 min, 4 °C) and the cells were collected. 1 mL of washed blood cells was resuspended in 50 mL of PBS. Next, 400  $\mu$ L of diluted blood cells were incubated with 600  $\mu$ L of the optimized HbNPs formulation (4 mg mL<sup>-1</sup> in TRIS 1). After incubation, the mixture was spun down at low speed (50 g, 5 min) to collect the blood cells and after that at a higher speed (4855 g, 5 min) in order to collect the HbNPs. The NPs were resuspended in TRIS 2 and their functionality was assessed by UV-vis as explained in section 2.4.3. One cycle and a half of oxygenation and deoxygenation were carried out.

The blood cells were imaged before and after incubation with the HbNPs using a light microscope (Carl Zeiss Inverted Axiovert 25 microscope).

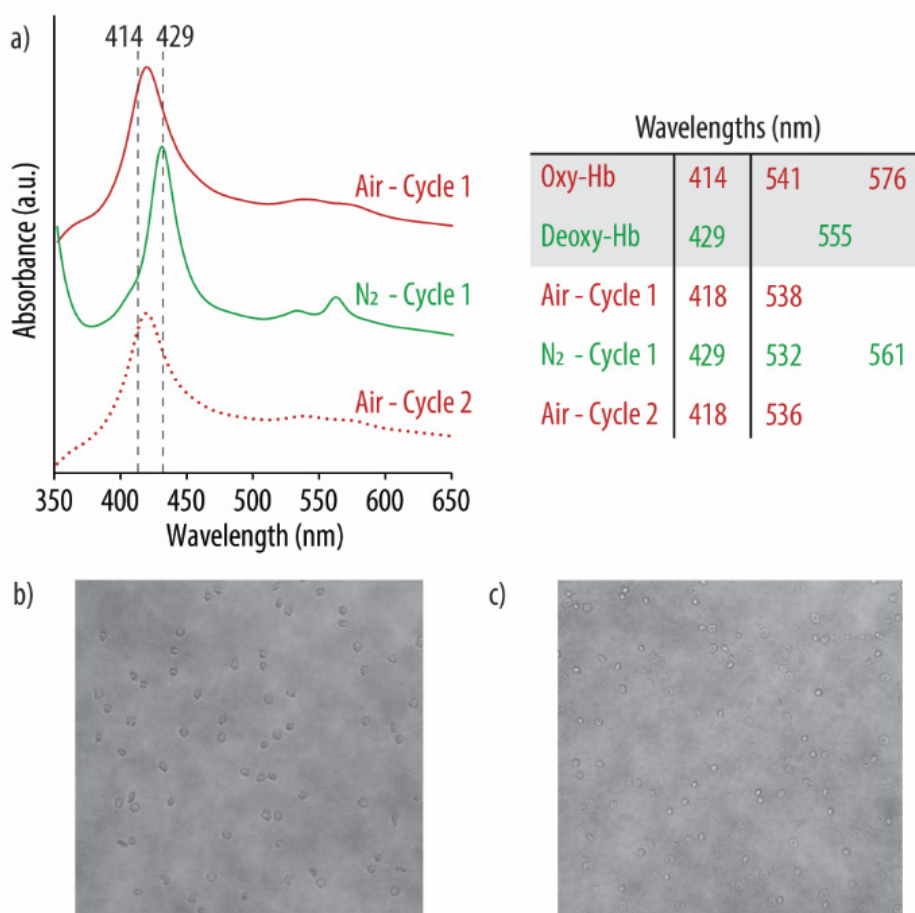

**Figure S4.** UV-vis spectra of oxygenated (oxy-Hb) and deoxygenated (deoxy-Hb) Hb after successively purging with compressed air (red lines) and nitrogen (N<sub>2</sub>) gas (green lines) the optimized HbNPs (i.e., HbNPs-26) after 1h incubation with blood cells. Following preparation, the UV-vis spectrum shows the characteristic peak of oxy-Hb with a main band at 418 nm (Soret peak). After purging with N<sub>2</sub> and addition of SDT, the Soret peak shifted to 429 nm showing the main absorption band of deoxy-Hb. The final purging with compressed air resulted in the reoxygenation of the Hb. Images of the blood cells before (b) and after (c) incubation with the HbNPs.



## 2. Incubation of the optimized HbNPs with RAW cells

RAW 264.7 macrophage cell line (European Collection of Authenticated Culture Collections, Wiltshire, UK) was cultured in DMEM supplemented with FBS (10% v/v) and penicillin/streptomycin (1% v/v, 10 000 U mL<sup>-1</sup> and 0.01 mg mL<sup>-1</sup>, respectively). The cells were cultured at 37 °C in a humidified incubator with 5% CO<sub>2</sub>. 173 000 RAW 464.7 cells per well were seeded in a 24-well plate. After 24 h of incubation, the attached cells were washed with PBS (2×, 1 mL) and incubated for 4 h with the optimized HbNPs (0.5 mg mL<sup>-1</sup> in cell media). Next, the cell media was collected and the HbNPs were retrieved after centrifugation (4855 g, 5 min). The functionality of the HbNPs was assessed by UV-vis as explained in section 2.4.3. One cycle and a half of oxygenation and deoxygenation were carried out.

The RAW cells were imaged before and after incubation with the HbNPs using the light microscope (Carl Zeiss Inverted Axiovert 25 microscope).

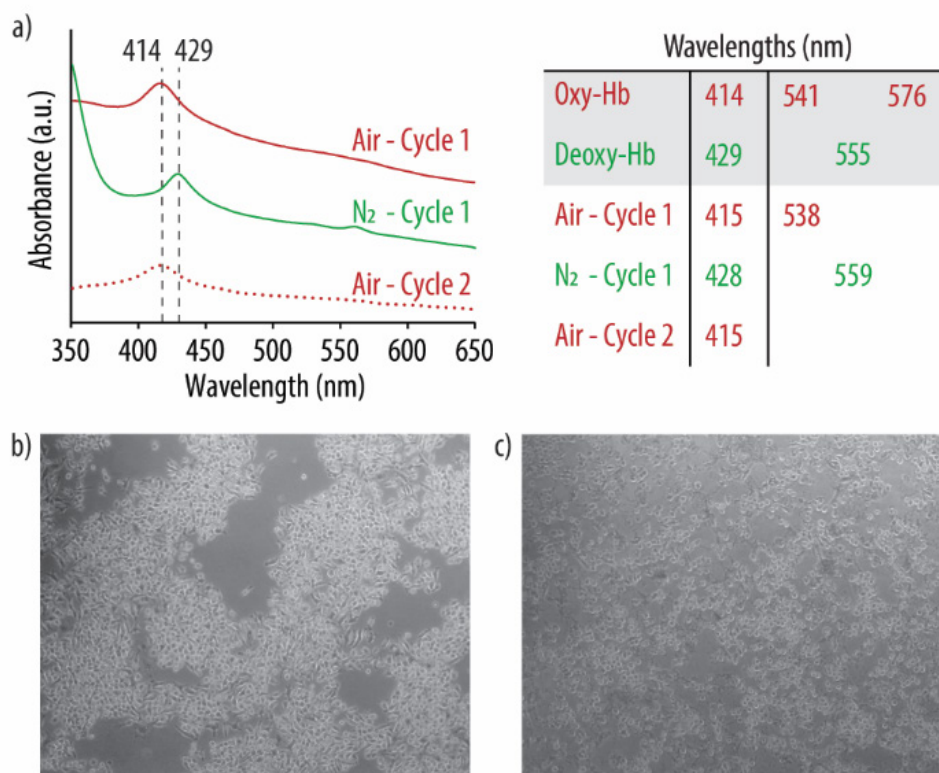

**Figure S5.** UV-vis spectra of oxygenated (oxy-Hb) and deoxygenated (deoxy-Hb) Hb after successively purging with compressed air (red lines) and nitrogen (N<sub>2</sub>) gas (green lines) the optimized HbNPs (i.e., HbNPs-26) after 4h incubation with RAW cells. Following preparation, the UV-vis spectrum shows the characteristic peak of oxy-Hb with a main band at 415 nm (Soret peak). After purging with N<sub>2</sub> and addition of SDT, the Soret peak shifted to 428 nm showing the main absorption band of deoxy-Hb. The final purging with compressed air resulted in the reoxygenation of the Hb. These shifts of the Soret peak after oxygenation/deoxygenation demonstrate the ability of the Hb to reversibly bind and release oxygen after 4 h incubation with RAW cells. Images of the RAW cells before (b) and after (c) incubation with the optimized HbNPs.
